# Supplementary material for: Influence of the Reaction Conditions in the Crystal Structures of Zn(II) and Ni(II) Coordination Compounds with a Dissymmetric Bis(Thiosemicarbazone) Ligand
Source: MDPI journal article supplement (doi:10.3390/cryst12030310), 2022-02-23
Supplement: s1 [file s1]

Archive with 1 entries (1 files):
- crystals-1602955-SI.pdf
