# Supplementary material for: Influence of the Reaction Conditions in the Crystal Structures of Zn(II) and Ni(II) Coordination Compounds with a Dissymmetric Bis(Thiosemicarbazone) Ligand
Source: MDPI journal article supplement (doi:10.3390/cryst12030310), 2022-02-23
Supplement: s1 [file s1 › crystals-1602955-SI.pdf]

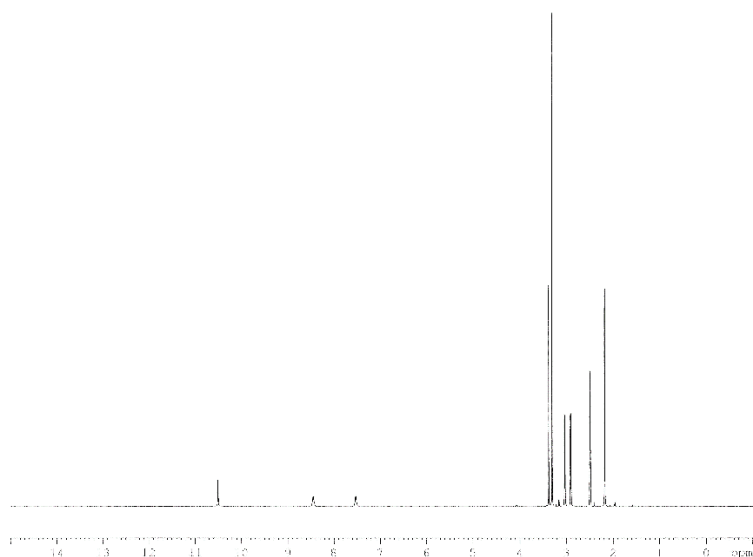

Figure S1.  $^1\text{H}$  NMR spectrum in  $\text{DMSO-d}_6$  of H HMeATSM.

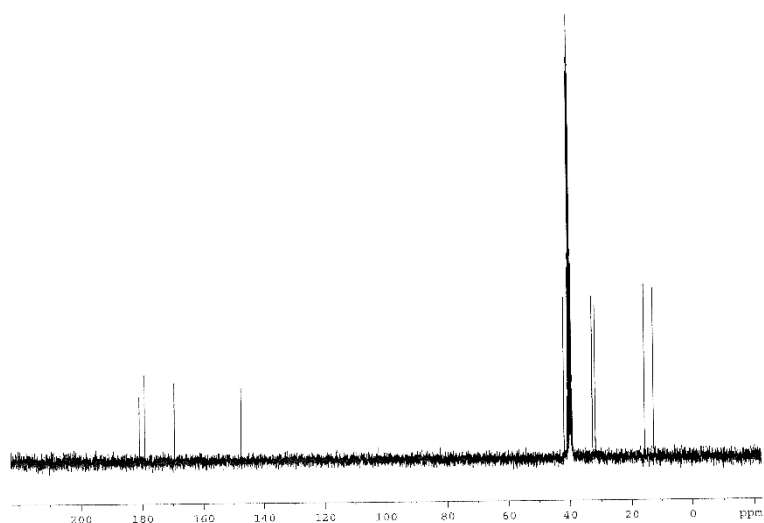

Figure S2.  $^{13}\text{C}$  NMR spectrum in  $\text{DMSO-d}_6$  of HMeATSM.

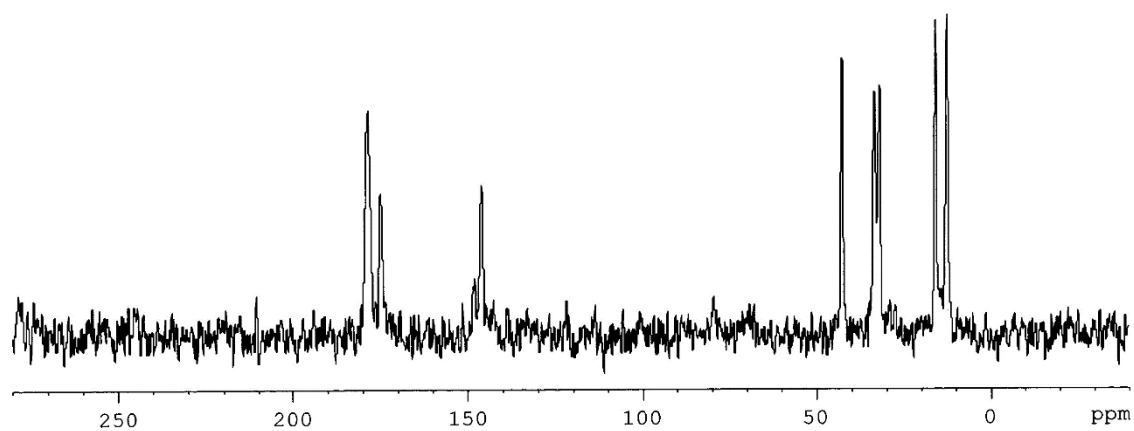

Figure S3.  $^{13}\text{C}$  CP/MAS NMR spectrum of HMeATSM.

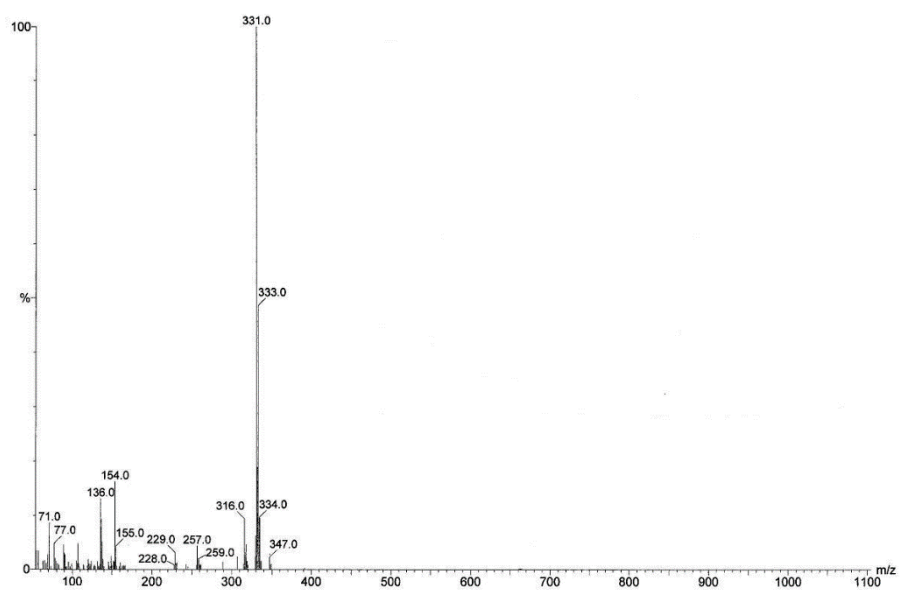

Figure S4. ESI<sup>+</sup> spectrum of complex 1.

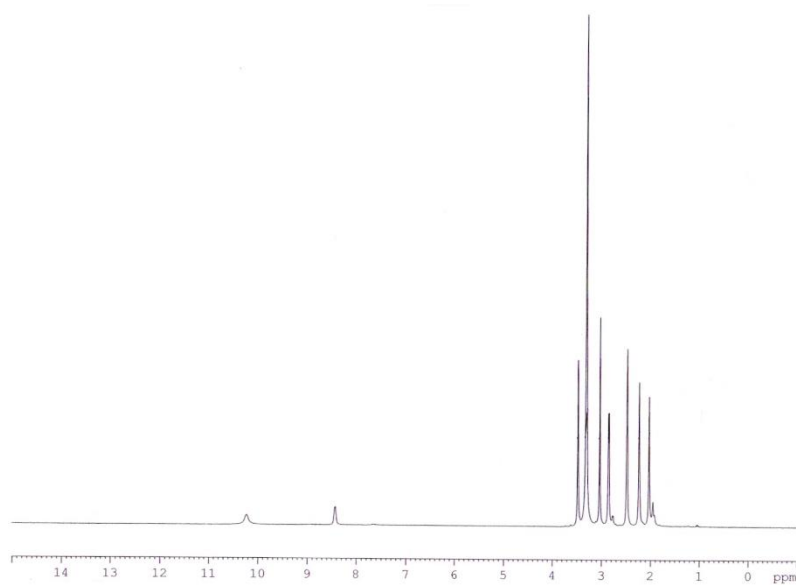

Figure S5. <sup>1</sup>H NMR spectrum in DMSO-d<sub>6</sub> of complex 1.

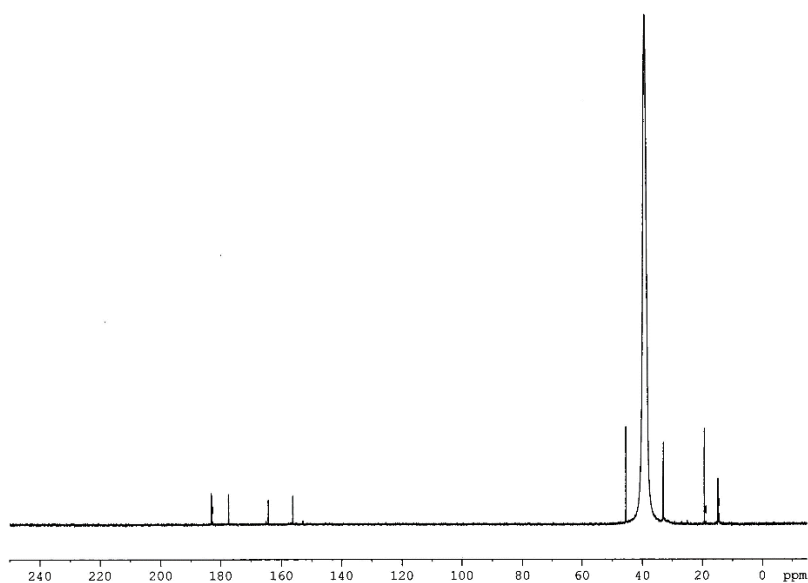

Figure S6.  $^{13}\text{C}$  NMR spectrum in  $\text{DMSO-d}_6$  of complex 1.

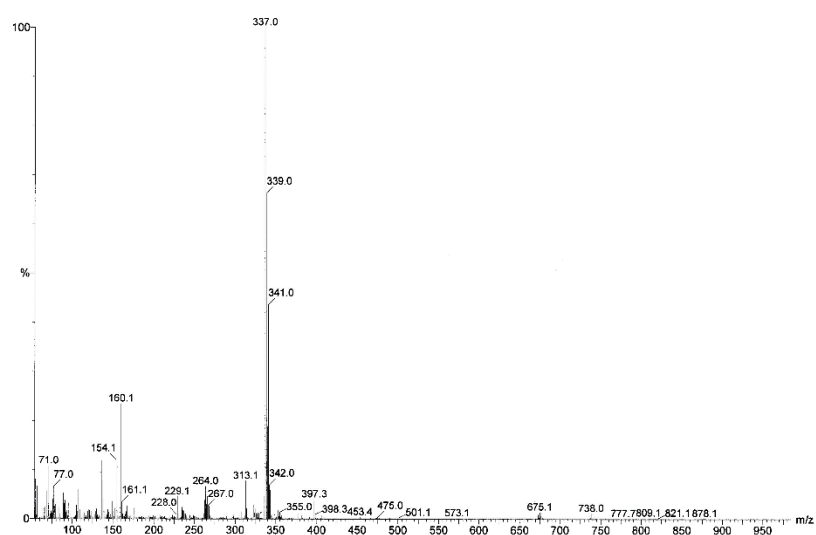

Figure S7.  $\text{ESI}^+$  spectrum of complex 2.

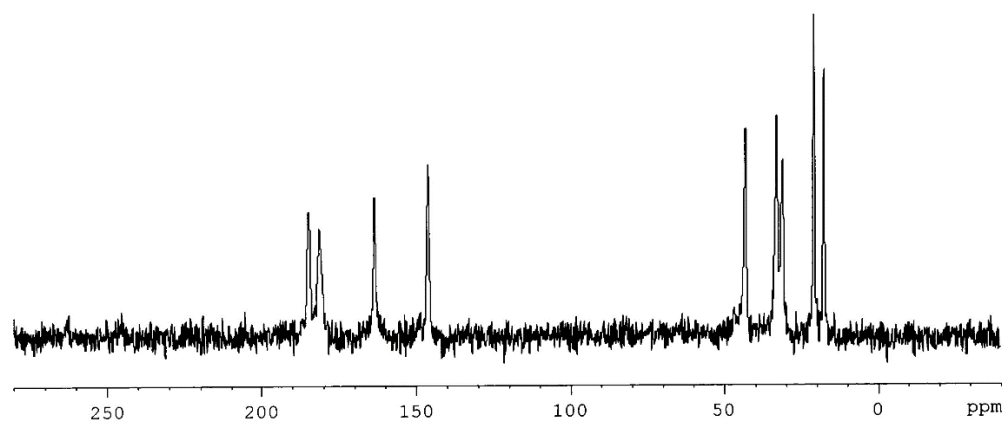

Figure S8.  $^{13}\text{C}$  CP/MAS NMR spectrum of complex 2.

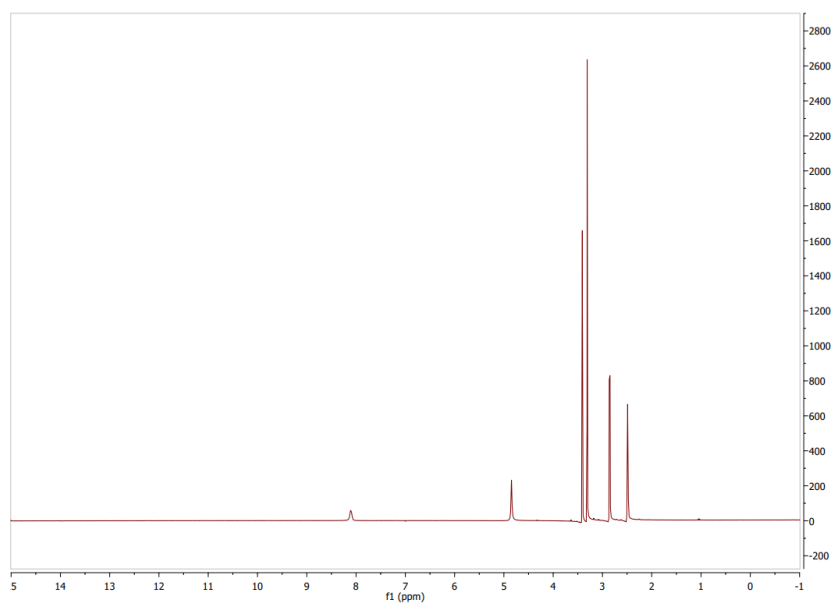

Figure S9.  $^1\text{H}$  NMR spectrum in  $\text{DMSO-d}_6$  of complex 3.

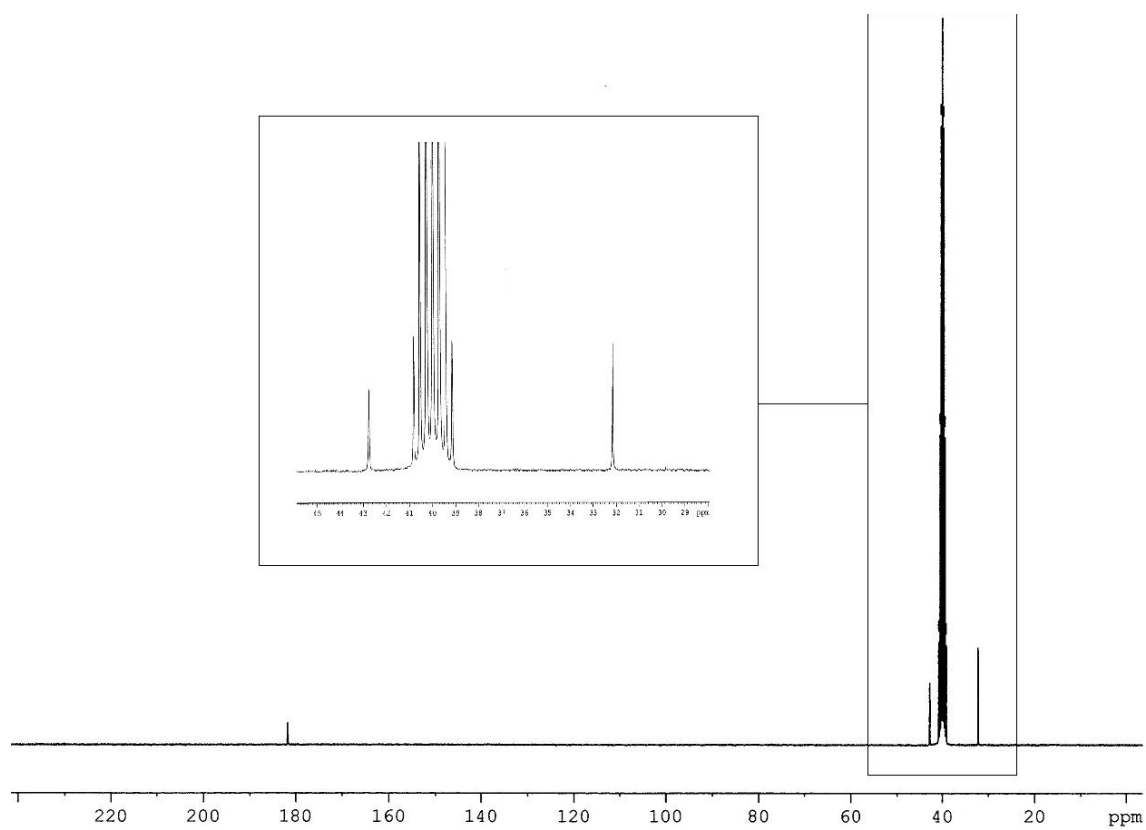

Figure S10.  $^{13}\text{C}$  NMR spectrum in  $\text{DMSO-d}_6$  of complex 3.
